# Supplementary material
Source: publisher figshare collection journal article supplement (https://acs.figshare.com/ndownloader/files/4021336)
Supplement: Supplementary file 1 [file 4021336]

## **Supporting Information For:**

### **Long-Term Trends in Motor Vehicle Emissions in U.S. Urban Areas**

Brian C. McDonald<sup>§</sup>, Drew R. Gentner<sup>§,†</sup>, Allen H. Goldstein<sup>†,§</sup>, and Robert A. Harley<sup>\*,§</sup>

<sup>§</sup> Department of Civil and Environmental Engineering, University of California, Berkeley, CA 94720

<sup>†</sup> Department of Environmental Science, Policy, and Management, University of California, Berkeley, CA 94720

\*Corresponding author email: harley@ce.berkeley.edu; phone: (510) 643-9168.

### **Summary of Supporting Information:**

12 Pages (excluding cover): S1-S23

### **Tables**

- S1. Summary of On-road Studies for Gasoline CO Run Exhaust Emission Factors
- S2. Summary of On-road Gasoline CO Run Exhaust Emission Factor Regression
- S3. Summary of On-road Diesel CO and NMHC Run Exhaust Emission Factor Regressions
- S4. Summary of Gasoline NMHC/CO Ratios from Summertime Ambient Studies
- S5. Summary of Los Angeles On-road Gasoline Fuel Consumption, Emission Factors, and Emissions
- S6. Summary of Los Angeles On-road Diesel Fuel Consumption, Emission Factors, and Emissions
- S7. Summary of New York City and Houston On-road Gasoline Fuel Consumption, Emission Factors, and Emissions

### **Figures**

- S1. Light- and Heavy-duty Vehicle CO and NMHC Emission Factor Trends
- S2. Map of South Coast Air Basin
- S3. Map of New York City-Newark Urban Area
- S4. Map of Houston Urban Area
- S5. Trends in Vehicle Fleet Age for U.S., California, Los Angeles, New York City, and Houston
- S6. Vehicle Age Distributions of Remote Sensing

S7. Decadal Changes in U.S. Vehicle Age Distribution

S8. Vehicle Age Distributions of High and Low-Emitting Vehicles for CO Running Exhaust Emissions

S9. Cumulative Distribution of CO, NMHC, and NO<sub>x</sub> Running Exhaust Emissions from Light- and Heavy-duty Vehicles

S10. Variability of Running Exhaust CO Emission Factors with Engine Load

S11. Ambient ratios of CO/NO<sub>x</sub> across South Coast Air Basin

**TABLE S1. Summary of On-road Studies for Gasoline CO Run Exhaust Emission Factors**

| Location                              | Type              | Date                | CO EF<br>[g/kg fuel] | Mean Age<br>[y] <sup>a</sup> | Reference         |
|---------------------------------------|-------------------|---------------------|----------------------|------------------------------|-------------------|
| Chicago, IL<br>(Central Ave)          | Remote<br>Sensing | Aug/89              | 154.5                | 6.1                          | Zhang et al. (1)  |
|                                       |                   | Oct/90              | 133.3                | 5.5                          |                   |
|                                       |                   | Jun/92              | 127.8                | 6.4                          |                   |
| Chicago, IL<br>(Arlington<br>Heights) | Remote<br>Sensing | Sep/97              | 55.8                 | 5.0                          | Bishop et al. (2) |
|                                       |                   | Sep/98              | 48.3                 | 5.1                          |                   |
|                                       |                   | Sep/99              | 44.2                 | 5.1                          |                   |
|                                       |                   | Sep/00              | 32.5                 | 5.2                          |                   |
|                                       |                   | Sep/02              | 28.1                 | 5.3                          |                   |
|                                       |                   | Sep/04              | 21.3                 | 5.5                          |                   |
|                                       |                   | Sep/06              | 15.8                 | 5.7                          |                   |
| Phoenix, AZ                           | Remote<br>Sensing | Nov/99              | 41.9                 | 5.9                          | Bishop et al. (2) |
|                                       |                   | Nov/00              | 35.5                 | 5.7                          |                   |
|                                       |                   | Nov/02              | 28.8                 | 5.5                          |                   |
|                                       |                   | Nov/04              | 24.1                 | 5.5                          |                   |
|                                       |                   | Nov/06              | 14.4                 | 5.6                          |                   |
| Denver, CO<br>(Speer Blvd)            | Remote<br>Sensing | May/89              | 170.3                | 6.6                          | Bishop et al. (3) |
|                                       |                   | Oct/91              | 116.1                | 6.3                          | Bishop et al. (4) |
|                                       |                   | Apr/92              | 116.5                | 6.4                          |                   |
|                                       |                   | Jul-Aug/96          | 84.4                 | 7.0                          |                   |
|                                       |                   | Dec/02 <sup>b</sup> | 34.4                 | 6.5                          |                   |

| Location                            | Type              | Date          | CO EF<br>[g/kg fuel] | Mean Age<br>[y] <sup>a</sup> | Reference               |
|-------------------------------------|-------------------|---------------|----------------------|------------------------------|-------------------------|
| Denver, CO<br>(6 <sup>th</sup> Ave) | Remote<br>Sensing | Dec/95-Jan/96 | 73.8                 | 6.8                          | Stedman et al. (5)      |
|                                     |                   | Dec/96-Jan/97 | 67.9                 | 6.7                          | Stedman et al. (6)      |
|                                     |                   | Jan/99        | 59.7                 | 6.6                          | Bishop et al. (2)       |
|                                     |                   | Jan/00        | 57.7                 | 6.6                          |                         |
|                                     |                   | Jan/01        | 46.6                 | 6.4                          |                         |
|                                     |                   | Jan/03        | 46.5                 | 6.6                          |                         |
|                                     |                   | Jan/05        | 30.4                 | 6.9                          |                         |
|                                     |                   | Jan-Feb/07    | 25.5                 | 7.2                          |                         |
| Oakland, CA<br>(Caldecott)          | Tunnel            | Aug/94        | 105.7                | 6.4 <sup>c</sup>             | Kirchstetter et al. (7) |
|                                     |                   | Jul-Aug/95    | 94.6                 | 6.3                          | Kean et al. (8)         |
|                                     |                   | Jul-Aug/96    | 74.3                 | 6.5                          |                         |
|                                     |                   | Jul-Aug/97    | 75.7                 | 6.7                          |                         |
|                                     |                   | Jul-Aug/99    | 52.0                 | 6.4 <sup>c</sup>             | Ban-Weiss et al. (9)    |
|                                     |                   | Jul-Aug/01    | 43.0                 | 6.2                          |                         |
|                                     |                   | Jul-Aug/06    | 24.0                 | 6.3                          |                         |
|                                     |                   | Jul/10        | 14.3                 | 6.4 <sup>c</sup>             | Dallmann et al. (10)    |
| San Jose, CA                        | Remote<br>Sensing | Oct/99        | 49.6                 | 6.9                          | Bishop et al. (11)      |
|                                     |                   | Mar/08        | 16.9                 | 7.6                          |                         |
| Los Angeles,<br>CA                  | Remote<br>Sensing | Dec/89        | 202.1                | 7.7                          | Lawson et al. (12)      |
|                                     |                   | May-Jun/91    | 146.4                | 6.5                          | Singer et al. (13)      |
|                                     |                   | May-Oct/97    | 108.1                | 6.6                          | Singer et al. (14)      |

| Location          | Type           | Date       | CO EF<br>[g/kg fuel] | Mean Age<br>[y] <sup>a</sup> | Reference            |
|-------------------|----------------|------------|----------------------|------------------------------|----------------------|
| W Los Angeles, CA | Remote Sensing | Nov/99     | 69.6                 | 7.2                          | Bishop et al. (2)    |
|                   |                | Oct/01     | 56.9                 | 7.3                          |                      |
|                   |                | Oct/03     | 44.3                 | 7.2                          |                      |
|                   |                | Oct/05     | 28.1                 | 6.9                          |                      |
|                   |                | Mar/08     | 21.1                 | 7.0                          | Bishop et al. (11)   |
| Van Nuys, CA      | Remote Sensing | Aug/10     | 20.9                 | 9.1                          | Bishop et al. (15)   |
|                   | Tunnel         | Sep/93     | 175.7                | 7.3                          | Fraser et al. (16)   |
|                   |                | 1995       | 120.0                | 11.2                         | Gertler et al. (17)  |
|                   |                | Aug/10     | 21.3                 | 9.1                          | Fujita et al. (18)   |
| Riverside, CA     | Remote Sensing | Jun-Jul/99 | 70.3                 | 7.1                          | Pokharel et al. (19) |
|                   |                | May-Jun/00 | 65.6                 | 7.3                          |                      |
|                   |                | Jun/01     | 50.9                 | 7.0                          |                      |

Notes:

- Age [y] = CY – mean vehicle fleet MY, where CY = Calendar Year and MY = Model Year.
- This dataset can be found at: [http://www.feat.biochem.du.edu/light\\_duty\\_vehicles.html](http://www.feat.biochem.du.edu/light_duty_vehicles.html).
- The mean model year was not reported for these studies. Age was calculated as the average of study years where fleet age information was available.

**TABLE S2. Summary of On-road Gasoline CO Run Exhaust Emission Factor Regression<sup>a,b</sup>**

|           | Coef.  | s.e.  | t value <sup>c</sup> |
|-----------|--------|-------|----------------------|
| $\beta_0$ | 118.7  | 11.5  | 10.3                 |
| $\beta_1$ | 0.395  | 0.046 | 8.5                  |
| $\beta_2$ | -14.26 | 0.85  | -16.7                |
| $\beta_3$ | 5.10   | 1.65  | 3.1                  |
| $\beta_4$ | -2.28  | 0.58  | -3.9                 |
| $\beta_5$ | 33.7   | 6.6   | 5.1                  |

Notes:

- Model:  $Y_{CO,EF} \text{ (g/kg fuel)} = \beta_0 + \beta_1*(CY - 1990)^2 + \beta_2*(CY-1990) + \beta_3*Age + \beta_4*CA + \beta_5*CA*(CY-1990)$ , where Age [y] = CY – mean vehicle fleet MY, CA = (0: US, 1: CA).
- $R^2 = 0.95$ .
- All coefficients are statistically significant to the 99% confidence level.

**TABLE S3. Summary of On-road Diesel CO and NMHC Run Exhaust Emission Factor Regressions**

|                        | Coef.    | s.e.  | t value           |
|------------------------|----------|-------|-------------------|
| CO EF <sup>a</sup> :   |          |       |                   |
| $\beta_0$              | 19.25    | 1.58  | 12.2 <sup>c</sup> |
| $\beta_1$              | -0.470   | 0.123 | -3.8 <sup>c</sup> |
| NMHC EF <sup>b</sup> : |          |       |                   |
| $\beta_0$              | 2.083    | 0.488 | 4.3 <sup>c</sup>  |
| $\beta_1$              | 0.000423 | 0.035 | 0.01 <sup>d</sup> |

Notes:

- CO Model:  $Y_{CO,EF} \text{ (g/kg fuel)} = \beta_0 + \beta_1 * (CY - 1990)$ ;  $R^2 = 0.62$ .
- HC Model:  $Y_{HC,EF} \text{ (g/kg fuel)} = \beta_0 + \beta_1 * (CY - 1990)$ ;  $R^2 < 0.01$ .
- Coefficients are statistically significant to the 99% confidence level.
- Coefficient is not statistically significant.

**TABLE S4. Summary of Gasoline NMHC/CO Ratios from Summertime Ambient Studies**

| Year                    | Data                       | NMHC/CO Ratio [g/g] <sup>a,b</sup>     | Comments                                                     |
|-------------------------|----------------------------|----------------------------------------|--------------------------------------------------------------|
| 1987                    | SCAQS network N. Main site | 0.126 ± 0.024 (95% CI) (N=57, r=0.82)  | Over-constrained CMB <sup>c,d</sup>                          |
| 1994-2001 (summer data) | PAMS network N. Main Site  | 0.093 ± 0.007 (95% CI) (N=357, r=0.83) | Over-constrained CMB <sup>c,d</sup> , No trend observed      |
| 2002                    | Warneke et al. (20)        | 0.125 ± 0.054                          | Ensemble average of scaled up compound ratios <sup>d-f</sup> |
| 2005                    | Baker et al. (21)          | 0.144 ± 0.044                          | Ensemble average of scaled up compound ratios <sup>d-f</sup> |
| 2005                    | Gentner et al. (22)        | 0.104 ± 0.008 (95% CI)                 | Basic CMB <sup>d</sup>                                       |
| 2010                    | Warneke et al. (23)        | 0.119 ± 0.059                          | Ensemble average of scaled up compound ratios <sup>d-f</sup> |

**Notes:**

- The NMHC/CO ratios presented here include unburnt fuel, products of incomplete combustion in tailpipe exhaust, and fugitive (e.g. evaporative) emissions from vehicles and storage tanks.
- Ratios are shown with standard deviations unless indicated otherwise.
- Over-constrained CMB methods are described in detail in Gentner et al. (24) and used fuel data from the periods of interest. Tracer compounds used in this analysis were isopentane, 3-methylpentane, 3-methylhexane, methylcyclohexane, and isooctane (& n-butane in 1987).
- Ambient ratios are scaled up assuming 24% of NMHC emissions are products of incomplete combustion (7).
- Ambient ratios are scaled up assuming 24% of total gasoline-related emissions are non-tailpipe, which was derived from Gentner et al. (22) for 2005 and from CMB analysis in this study for 1987 and PAMS 1994-2001.

Each gasoline tracer is scaled to total NMHC by their presence in liquid fuel samples taken over this time period (24, 25). These analyses are more uncertain and likely an upper limit due to the contribution of other sources of hydrocarbon emissions.



**TABLE S5. Summary of Los Angeles On-road Gasoline Fuel Consumption, Emission Factors, and Emissions**

| Calendar Year | Fuel <sup>a,c</sup><br>(10 <sup>9</sup> L/yr) | Run CO EF <sup>d,e</sup><br>(g/kg) | Run CO Emissions <sup>f,g</sup><br>(t/d) | Cold CO Emissions <sup>h</sup><br>(t/d) | NMHC EF <sup>i</sup><br>(g/kg) | Tot NMHC Emissions <sup>j</sup><br>(t/d) |
|---------------|-----------------------------------------------|------------------------------------|------------------------------------------|-----------------------------------------|--------------------------------|------------------------------------------|
| 1990          | 21 ± 2                                        | 179 ± 11                           | 7800 ± 1000                              | 1500 ± 200                              | 21.2 ± 3.6                     | 1100 ± 210                               |
| 1991          | 21 ± 2                                        | 163 ± 9                            | 7000 ± 900                               | 1400 ± 200                              | 19.3 ± 3.3                     | 990 ± 190                                |
| 1992          | 21 ± 2                                        | 148 ± 8                            | 6300 ± 800                               | 1400 ± 200                              | 17.6 ± 3.0                     | 900 ± 170                                |
| 1993          | 21 ± 2                                        | 134 ± 7                            | 5700 ± 700                               | 1300 ± 200                              | 15.9 ± 2.7                     | 830 ± 160                                |
| 1994          | 21 ± 2                                        | 121 ± 7                            | 5100 ± 600                               | 1200 ± 200                              | 14.3 ± 2.4                     | 750 ± 140                                |
| 1995          | 21 ± 2                                        | 109 ± 6                            | 4600 ± 600                               | 1200 ± 200                              | 12.9 ± 2.2                     | 690 ± 130                                |
| 1996          | 21 ± 2                                        | 97 ± 6                             | 4200 ± 500                               | 1200 ± 200                              | 11.5 ± 2.0                     | 630 ± 120                                |
| 1997          | 21 ± 2                                        | 86 ± 6                             | 3800 ± 500                               | 1100 ± 200                              | 10.2 ± 1.7                     | 580 ± 110                                |
| 1998          | 22 ± 2                                        | 76 ± 5                             | 3400 ± 400                               | 1000 ± 200                              | 9.0 ± 1.6                      | 520 ± 100                                |
| 1999          | 22 ± 2                                        | 66 ± 5                             | 3000 ± 400                               | 1000 ± 100                              | 7.9 ± 1.4                      | 470 ± 90                                 |
| 2000          | 23 ± 3                                        | 58 ± 5                             | 2700 ± 400                               | 860 ± 130                               | 6.9 ± 1.2                      | 420 ± 80                                 |
| 2001          | 23 ± 3                                        | 50 ± 5                             | 2400 ± 400                               | 780 ± 120                               | 5.9 ± 1.1                      | 370 ± 70                                 |
| 2002          | 24 ± 3                                        | 43 ± 5                             | 2100 ± 300                               | 710 ± 110                               | 5.1 ± 1.0                      | 330 ± 70                                 |
| 2003          | 24 ± 3                                        | 37 ± 5                             | 1800 ± 300                               | 640 ± 100                               | 4.4 ± 0.9                      | 290 ± 60                                 |
| 2004          | 24 ± 3                                        | 32 ± 5                             | 1600 ± 300                               | 570 ± 80                                | 3.8 ± 0.8                      | 260 ± 50                                 |
| 2005          | 24 ± 3                                        | 28 ± 5                             | 1400 ± 300                               | 500 ± 70                                | 3.3 ± 0.8                      | 230 ± 50                                 |
| 2006          | 24 ± 3                                        | 24 ± 5                             | 1200 ± 300                               | 430 ± 60                                | 2.9 ± 0.7                      | 190 ± 50                                 |
| 2007          | 24 ± 3                                        | 22 ± 5                             | 1100 ± 300                               | 380 ± 60                                | 2.6 ± 0.7                      | 170 ± 40                                 |
| 2008          | 23 ± 3                                        | 20 ± 5                             | 930 ± 280                                | 340 ± 50                                | 2.3 ± 0.7                      | 150 ± 40                                 |
| 2009          | 23 ± 3                                        | 18 ± 6                             | 870 ± 290                                | 320 ± 50                                | 2.2 ± 0.8                      | 140 ± 40                                 |
| 2010          | 23 ± 3                                        | 18 ± 7                             | 850 ± 320                                | 320 ± 50                                | 2.1 ± 0.9                      | 140 ± 40                                 |

Notes:

- Fuel use from McDonald et al. (26).
- Annual daily average shown here. To estimate weekday only, multiply by 1.01 (27).
- Uncertainty is calculated as the propagation of errors in state-level fuel sales reports and spatial apportionment to the urban scale. State-level uncertainty was calculated as the difference between the state's share of national gasoline sales and total vehicle miles traveled. Apportionment error is assumed from speed differences between urban and rural areas. This is estimated at ~10% by comparing average CO<sub>2</sub> emission factors (g/mi) for the South Coast air basin using an urban and rural VMT-weighted speed profile from EMFAC.
- Running exhaust emission factor shown here is derived from regression model of on-road studies. Uncertainty is denoted as 2σ.
- The long-term CO emission factor trend is reflective of changes in summertime emissions (see text).
- Emissions = Fuel x Emission Factor. Uncertainty calculated by error propagation.
- Running emissions for a given calendar year reflect local vehicle mixes across model years.
- Uncertainty is estimated as the seasonal variability in the start to running exhaust emission ratio from EMFAC.
- Calculated as Run CO EF \* NMHC/CO<sub>ambient</sub>. Includes evaporative emissions in addition to running exhaust. Start emissions not included. Uncertainty denoted as 2σ, and includes standard error of the mean of ambient data.
- Calculated as (Run + Cold CO emissions) \* NMHC/CO<sub>ambient</sub>. Start emissions are included.

**TABLE S6. Summary of Los Angeles On-road Diesel Fuel Consumption, Emission Factors, and Emissions**

| Calendar<br>Year | Fuel <sup>a,c</sup><br>(10 <sup>9</sup> L/yr) | Run CO<br>EF <sup>d</sup><br>(g/kg) | Run CO<br>Emissions <sup>e</sup><br>(t/d) | NMHC<br>EF <sup>d,f</sup><br>(g/kg) | Run NMHC<br>Emissions <sup>e,f</sup><br>(t/d) |
|------------------|-----------------------------------------------|-------------------------------------|-------------------------------------------|-------------------------------------|-----------------------------------------------|
| 1990             | 2.3 ± 0.3                                     | 19 ± 3                              | 100 ± 22                                  | 2.1 ± 1.1                           | 11 ± 6                                        |
| 1991             | 2.3 ± 0.3                                     | 19 ± 3                              | 98 ± 20                                   | 2.1 ± 1.1                           | 11 ± 6                                        |
| 1992             | 2.4 ± 0.3                                     | 18 ± 3                              | 98 ± 20                                   | 2.1 ± 1.0                           | 11 ± 6                                        |
| 1993             | 2.3 ± 0.3                                     | 18 ± 3                              | 95 ± 19                                   | 2.1 ± 0.9                           | 11 ± 5                                        |
| 1994             | 2.4 ± 0.3                                     | 17 ± 2                              | 96 ± 19                                   | 2.1 ± 0.9                           | 12 ± 5                                        |
| 1995             | 2.6 ± 0.3                                     | 17 ± 2                              | 100 ± 19                                  | 2.1 ± 0.8                           | 12 ± 5                                        |
| 1996             | 2.7 ± 0.4                                     | 16 ± 2                              | 102 ± 19                                  | 2.1 ± 0.7                           | 13 ± 5                                        |
| 1997             | 2.8 ± 0.4                                     | 16 ± 2                              | 103 ± 19                                  | 2.1 ± 0.7                           | 14 ± 5                                        |
| 1998             | 2.9 ± 0.4                                     | 15 ± 2                              | 101 ± 19                                  | 2.1 ± 0.7                           | 14 ± 5                                        |
| 1999             | 3.0 ± 0.4                                     | 15 ± 2                              | 102 ± 19                                  | 2.1 ± 0.6                           | 14 ± 5                                        |
| 2000             | 3.1 ± 0.4                                     | 14 ± 2                              | 103 ± 19                                  | 2.1 ± 0.6                           | 15 ± 5                                        |
| 2001             | 3.1 ± 0.4                                     | 14 ± 2                              | 100 ± 19                                  | 2.1 ± 0.6                           | 15 ± 5                                        |
| 2002             | 3.2 ± 0.4                                     | 13 ± 2                              | 97 ± 19                                   | 2.1 ± 0.6                           | 15 ± 5                                        |
| 2003             | 3.1 ± 0.4                                     | 13 ± 2                              | 93 ± 19                                   | 2.1 ± 0.6                           | 15 ± 5                                        |
| 2004             | 3.3 ± 0.4                                     | 12 ± 2                              | 95 ± 21                                   | 2.1 ± 0.6                           | 16 ± 5                                        |
| 2005             | 3.5 ± 0.5                                     | 12 ± 2                              | 96 ± 23                                   | 2.1 ± 0.7                           | 17 ± 6                                        |
| 2006             | 3.5 ± 0.5                                     | 11 ± 3                              | 92 ± 25                                   | 2.1 ± 0.7                           | 17 ± 6                                        |
| 2007             | 3.5 ± 0.5                                     | 11 ± 3                              | 89 ± 26                                   | 2.1 ± 0.7                           | 17 ± 6                                        |
| 2008             | 3.2 ± 0.4                                     | 11 ± 3                              | 78 ± 26                                   | 2.1 ± 0.8                           | 15 ± 6                                        |
| 2009             | 2.9 ± 0.4                                     | 10 ± 3                              | 68 ± 25                                   | 2.1 ± 0.9                           | 14 ± 6                                        |
| 2010             | 2.9 ± 0.4                                     | 10 ± 4                              | 65 ± 27                                   | 2.1 ± 0.9                           | 14 ± 6                                        |

Notes:

- Fuel use from McDonald et al. (26).
- Annual daily average shown here. To estimate weekday only, multiply by 1.29 (27).
- Uncertainty reported by McDonald et al. (26) for South Coast air basin, using an approach similar to on-road gasoline.
- Running exhaust emission factor shown here is derived from regression model of on-road studies. Uncertainty is denoted as 2σ.
- Emissions = Fuel x Emission Factor. Uncertainty calculated by error propagation.
- Tailpipe emissions only. Evaporative emissions are not included.

**TABLE S7. Summary of New York City and Houston On-road Gasoline Fuel Consumption, Emission Factors, and Emissions**

| NYC           |                                               |                                    |                                          | HOU                                           |                                    |                                          |
|---------------|-----------------------------------------------|------------------------------------|------------------------------------------|-----------------------------------------------|------------------------------------|------------------------------------------|
| Calendar Year | Fuel <sup>a,b</sup><br>(10 <sup>9</sup> L/yr) | Run CO EF <sup>c,d</sup><br>(g/kg) | Run CO Emissions <sup>e,f</sup><br>(t/d) | Fuel <sup>a,b</sup><br>(10 <sup>9</sup> L/yr) | Run CO EF <sup>c,d</sup><br>(g/kg) | Run CO Emissions <sup>e,f</sup><br>(t/d) |
| 1990          | 17 ± 2                                        | 141 ± 9                            | 5000 ± 600                               | 5.4 ± 0.9                                     | 138 ± 9                            | 1520 ± 270                               |
| 1991          | 17 ± 2                                        | 127 ± 7                            | 4400 ± 600                               | 5.2 ± 0.8                                     | 125 ± 8                            | 1320 ± 230                               |
| 1992          | 16 ± 2                                        | 115 ± 7                            | 3800 ± 500                               | 5.2 ± 0.8                                     | 112 ± 7                            | 1190 ± 210                               |
| 1993          | 16 ± 2                                        | 103 ± 6                            | 3400 ± 400                               | 5.4 ± 0.9                                     | 100 ± 7                            | 1120 ± 200                               |
| 1994          | 17 ± 2                                        | 92 ± 6                             | 3100 ± 400                               | 5.0 ± 0.8                                     | 89 ± 6                             | 920 ± 160                                |
| 1995          | 17 ± 2                                        | 82 ± 5                             | 2800 ± 400                               | 5.2 ± 0.8                                     | 79 ± 6                             | 850 ± 150                                |
| 1996          | 17 ± 2                                        | 72 ± 5                             | 2600 ± 300                               | 5.6 ± 0.9                                     | 69 ± 6                             | 800 ± 140                                |
| 1997          | 18 ± 2                                        | 64 ± 5                             | 2300 ± 300                               | 5.7 ± 0.9                                     | 61 ± 5                             | 710 ± 130                                |
| 1998          | 18 ± 2                                        | 56 ± 5                             | 2000 ± 300                               | 6.2 ± 1.0                                     | 53 ± 5                             | 670 ± 130                                |
| 1999          | 18 ± 2                                        | 49 ± 5                             | 1800 ± 300                               | 6.0 ± 1.0                                     | 46 ± 5                             | 570 ± 110                                |
| 2000          | 18 ± 2                                        | 42 ± 5                             | 1500 ± 200                               | 6.1 ± 1.0                                     | 40 ± 5                             | 500 ± 100                                |
| 2001          | 18 ± 2                                        | 37 ± 5                             | 1400 ± 200                               | 6.5 ± 1.1                                     | 34 ± 5                             | 450 ± 100                                |
| 2002          | 18 ± 2                                        | 32 ± 5                             | 1200 ± 200                               | 6.9 ± 1.1                                     | 30 ± 5                             | 420 ± 100                                |
| 2003          | 20 ± 2                                        | 28 ± 5                             | 1200 ± 200                               | 7.0 ± 1.1                                     | 26 ± 5                             | 380 ± 100                                |
| 2004          | 20 ± 2                                        | 25 ± 6                             | 1000 ± 300                               | 6.8 ± 1.1                                     | 24 ± 6                             | 330 ± 100                                |
| 2005          | 20 ± 2                                        | 23 ± 6                             | 930 ± 280                                | 6.7 ± 1.1                                     | 22 ± 7                             | 310 ± 100                                |
| 2006          | 20 ± 2                                        | 22 ± 8                             | 880 ± 330                                | 6.9 ± 1.1                                     | 22 ± 8                             | 300 ± 120                                |
| 2007          | 20 ± 2                                        | 21 ± 9                             | 860 ± 380                                | 7.1 ± 1.1                                     | 21 ± 9                             | 310 ± 140                                |
| 2008          | 19 ± 2                                        | 21 ± 9                             | 840 ± 370                                | 7.4 ± 1.2                                     | 21 ± 9                             | 330 ± 150                                |
| 2009          | 19 ± 2                                        | 21 ± 9                             | 800 ± 360                                | 7.6 ± 1.2                                     | 21 ± 9                             | 340 ± 150                                |
| 2010          | 20 ± 2                                        | 21 ± 9                             | 840 ± 380                                | 7.7 ± 1.3                                     | 21 ± 9                             | 340 ± 150                                |

Notes:

- Annual daily average shown here. To estimate weekday only, multiply by 1.01 (27).
- See footnotes in Table S5 for details on how uncertainty was calculated.
- Uncertainty denoted as 2σ, and based on running exhaust emission factor regression model.
- The long-term CO emission factor trend is reflective of changes in summertime emissions (see text).
- Emissions = Fuel x Emission Factor. Uncertainty calculated by error propagation.
- Running emissions for a given calendar year reflect local vehicle mixes across model years.

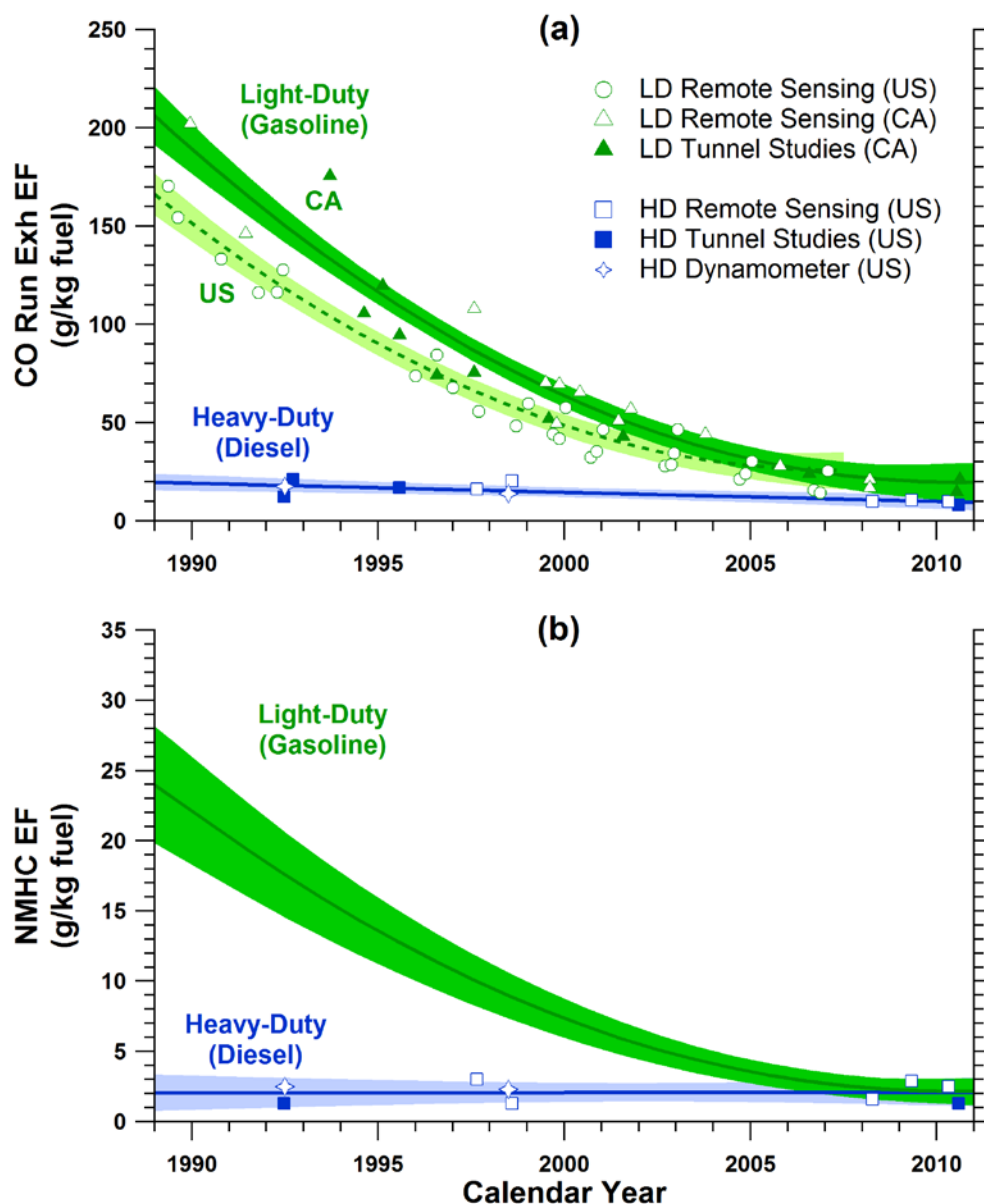

**FIGURE S1.** (a) Carbon monoxide running exhaust emission factor trends for light- and heavy-duty vehicles. Results are based on regression analyses of on-road studies (see text). Light-duty vehicles are shown separately for California and US. (b) NMHC emission factor trends for gasoline (running exhaust + evaporative) and diesel-powered vehicles (running exhaust). Light-duty NMHC emission factors are calculated as the product of CO emission factors in panel (a) and the NMHC/CO ratio derived from ambient analysis (see text). Start emission are not included. The heavy-duty NMHC emission factor trend is based on regression analysis. All uncertainties are shown as 95% confidence interval in both panels. See footnotes of Tables S4-S7 for basis of uncertainty.

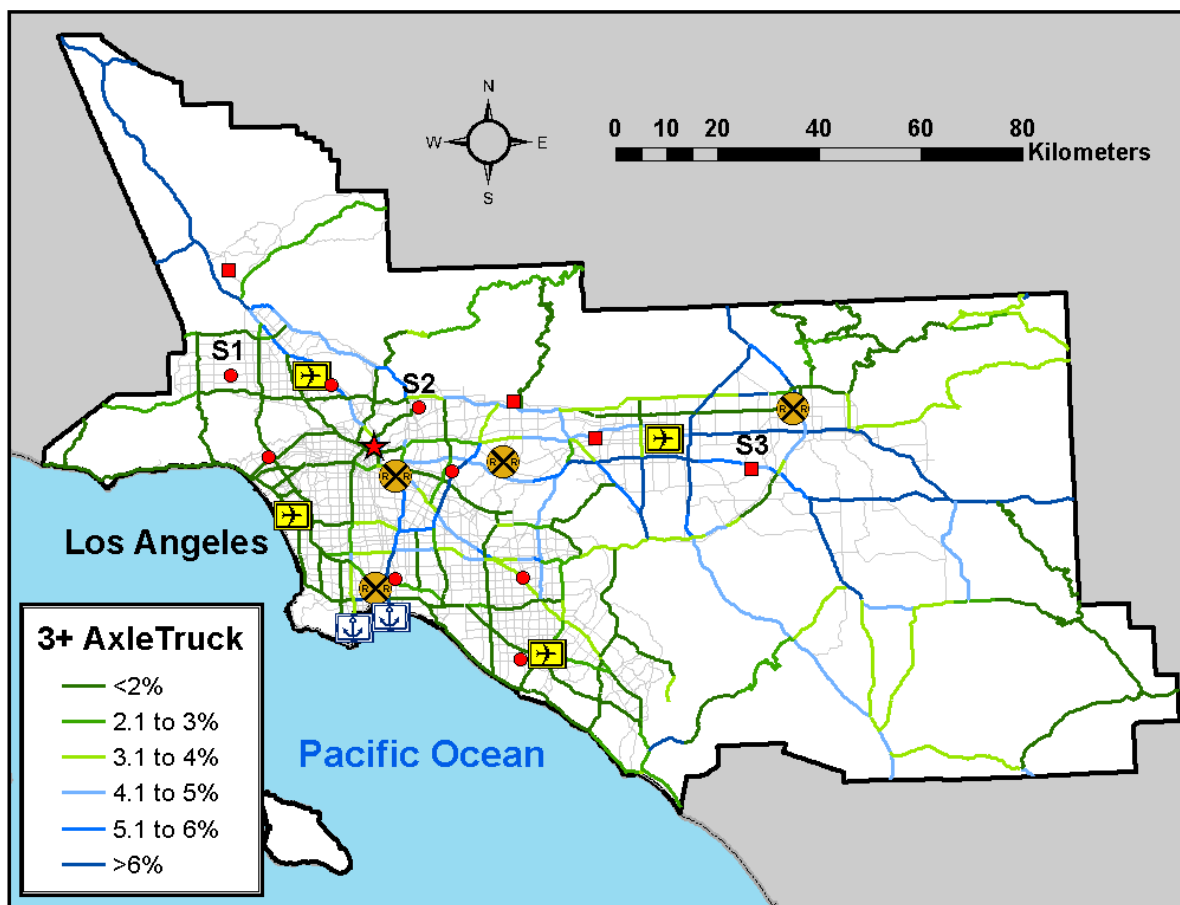

**FIGURE S2.** Map of South Coast air basin (shown in white) and location of ambient air monitoring sites. CO trends derived only from coastal locations (red circles). Ambient CO/NO<sub>x</sub> ratios derived from coastal and inland locations (red circles + squares). The North Main site is part of the PAMS network (red star) and was used to estimate NMHC/CO molar emission ratios from motor vehicles. Ambient monitoring locations were selected to represent traffic emissions and based on their proximity to major highways. The spatial variability in vehicle fleet mix is also shown on the state highway system (28), as represented by the fraction of 3+ axle trucks to total vehicular traffic (a spatial surrogate for diesel fuel use). Roadway segments color coded green are more gasoline-dominated than average (~4% of VMT by 3+ axle trucks), and blue segments are more diesel-dominated. See Figure S11 for influence on ambient CO/NO<sub>x</sub> (S1 = Reseda, S2 = Pasadena, and S3 = Rubidoux).

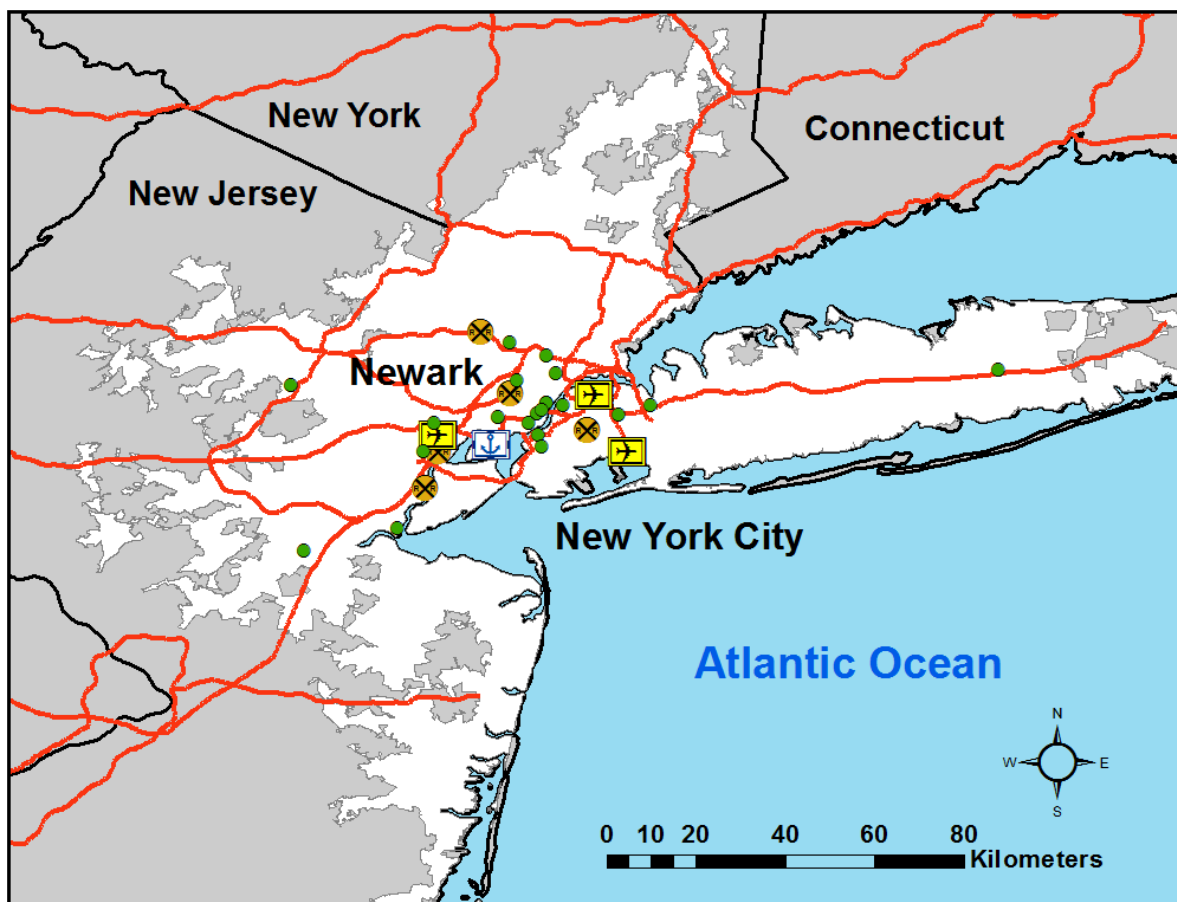

**FIGURE S3.** Map of New York City-Newark metropolitan area (shown in white) and location of ambient air monitoring sites (green circles). Monitoring sites are generally located near major highways. Monitors located on industrial land uses, in parks, or in areas which may not be representative of traffic emissions were excluded. Measurements are only available from 7-14 sites per year.

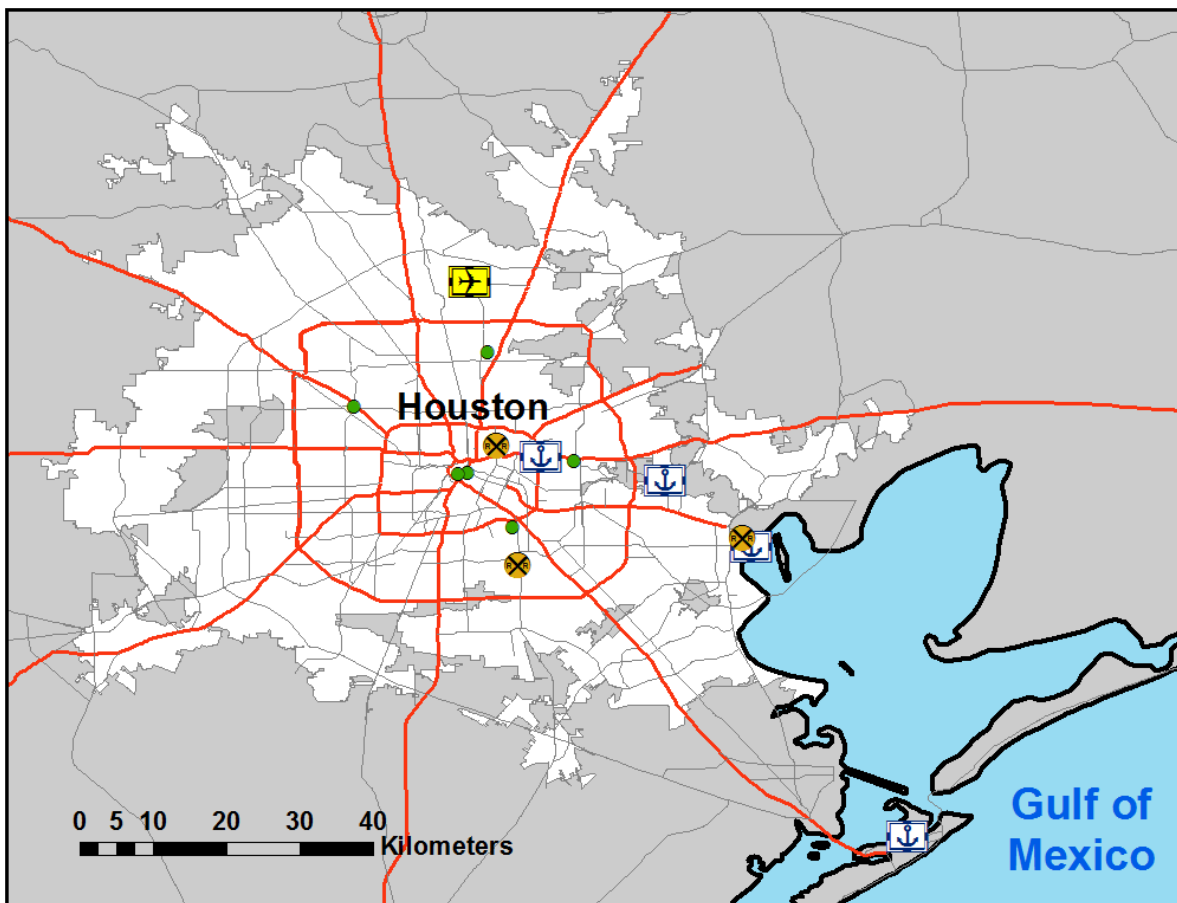

**FIGURE S4.** Map of Houston metropolitan area (shown in white) and location of ambient air monitoring sites (green circles). Monitoring sites are generally located near major highways. Monitors located in the major ship channel are excluded as these sites also have large industrial sources of emissions. Measurements are only available from 3-4 sites per year.

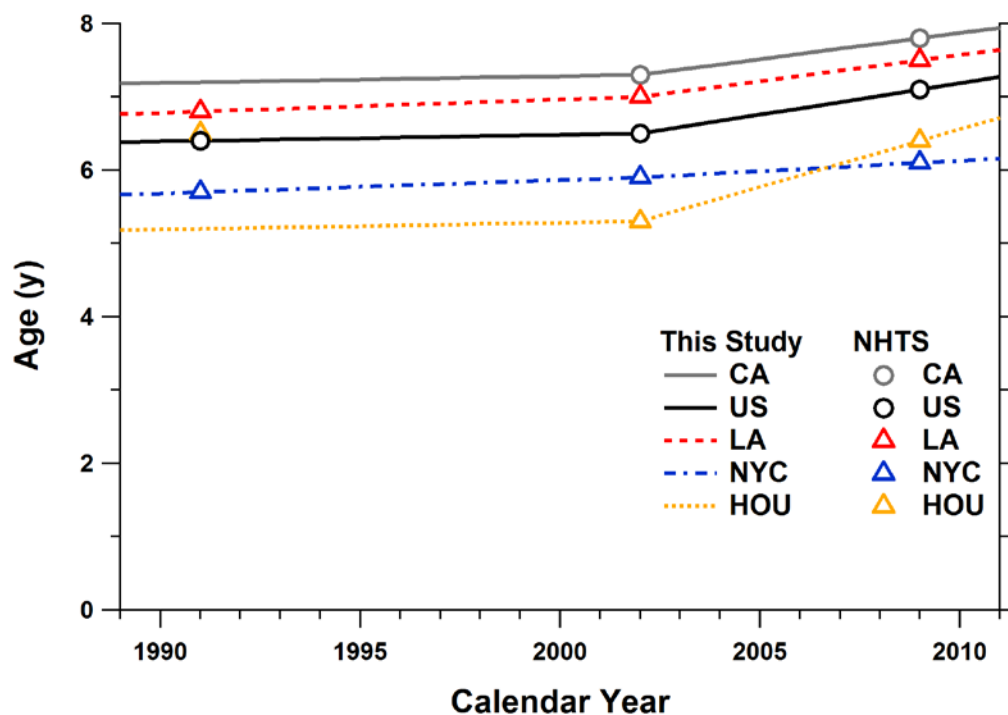

**FIGURE S5.** Mean light-duty vehicle fleet age for the U.S., California, Los Angeles, New York City, and Houston spatial domains. The mean age is derived from the National Household Travel Survey (29-31) and weighted by distance traveled. The fleet ages shown here are supplied to the CO emission factor regression for running exhaust for each of the domains specified. A data point for Houston in 1991 is treated as an outlier.



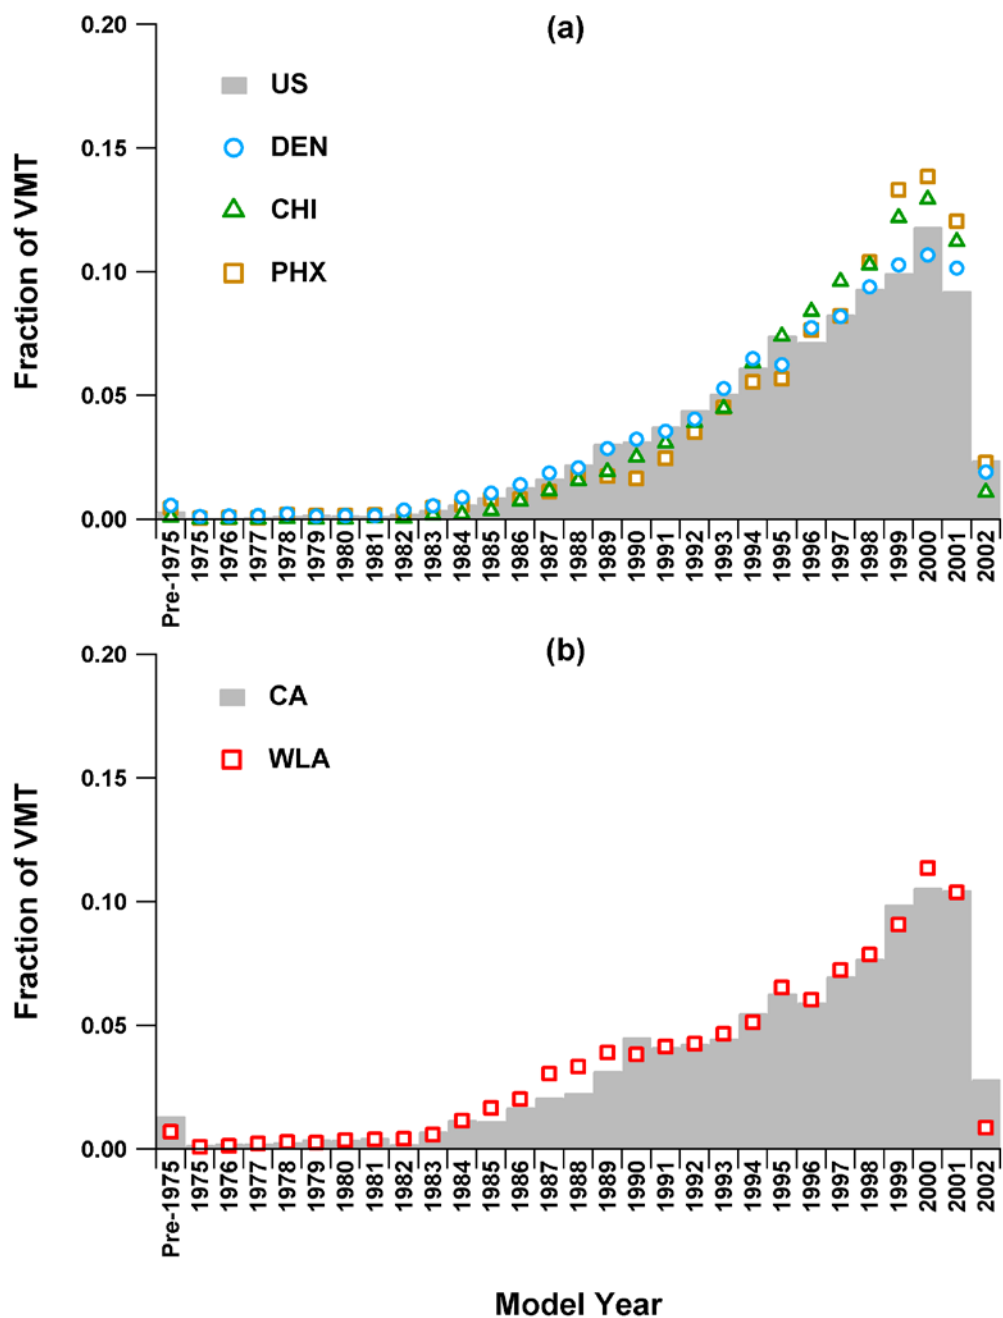

**FIGURE S6.** Comparison of light-duty vehicle age distributions between remote sensing and the (a) U.S. and (b) California vehicle fleets in calendar year 2001. The age distribution is weighted by vehicle miles traveled.

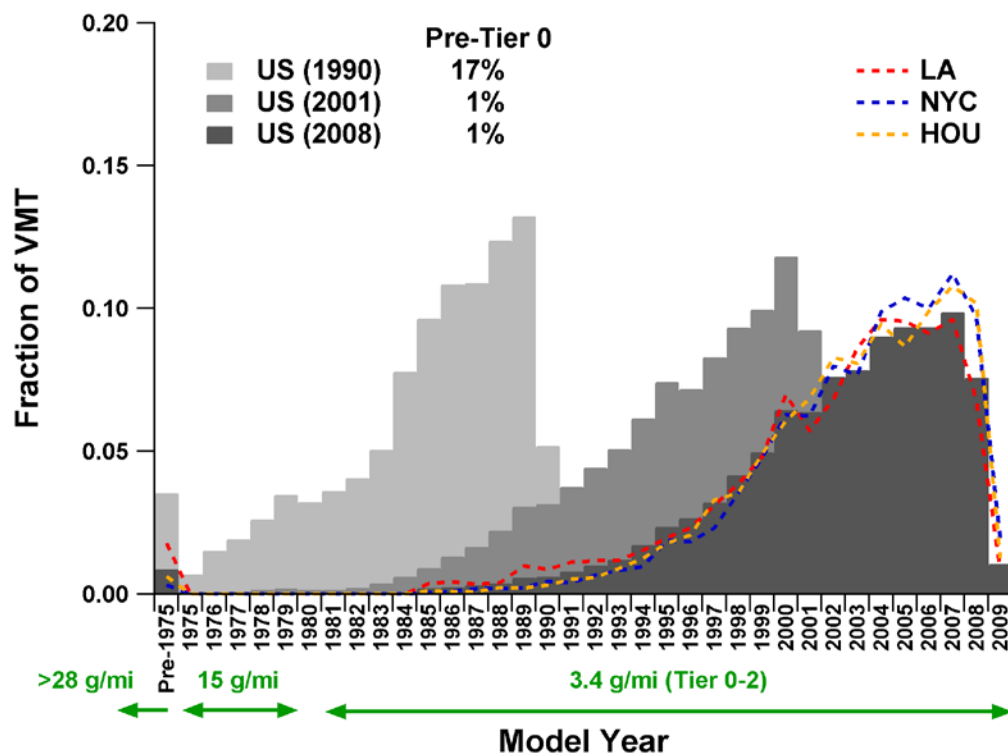

**FIGURE S7.** Vehicle age distribution of U.S., Los Angeles, New York City, and Houston vehicle fleets over time (29-31). Successive federal CO emission standards are shown for light-duty vehicles at bottom (32). Large changes in emission standards occurred prior to Tier 0 standards, which started with model year 1981.

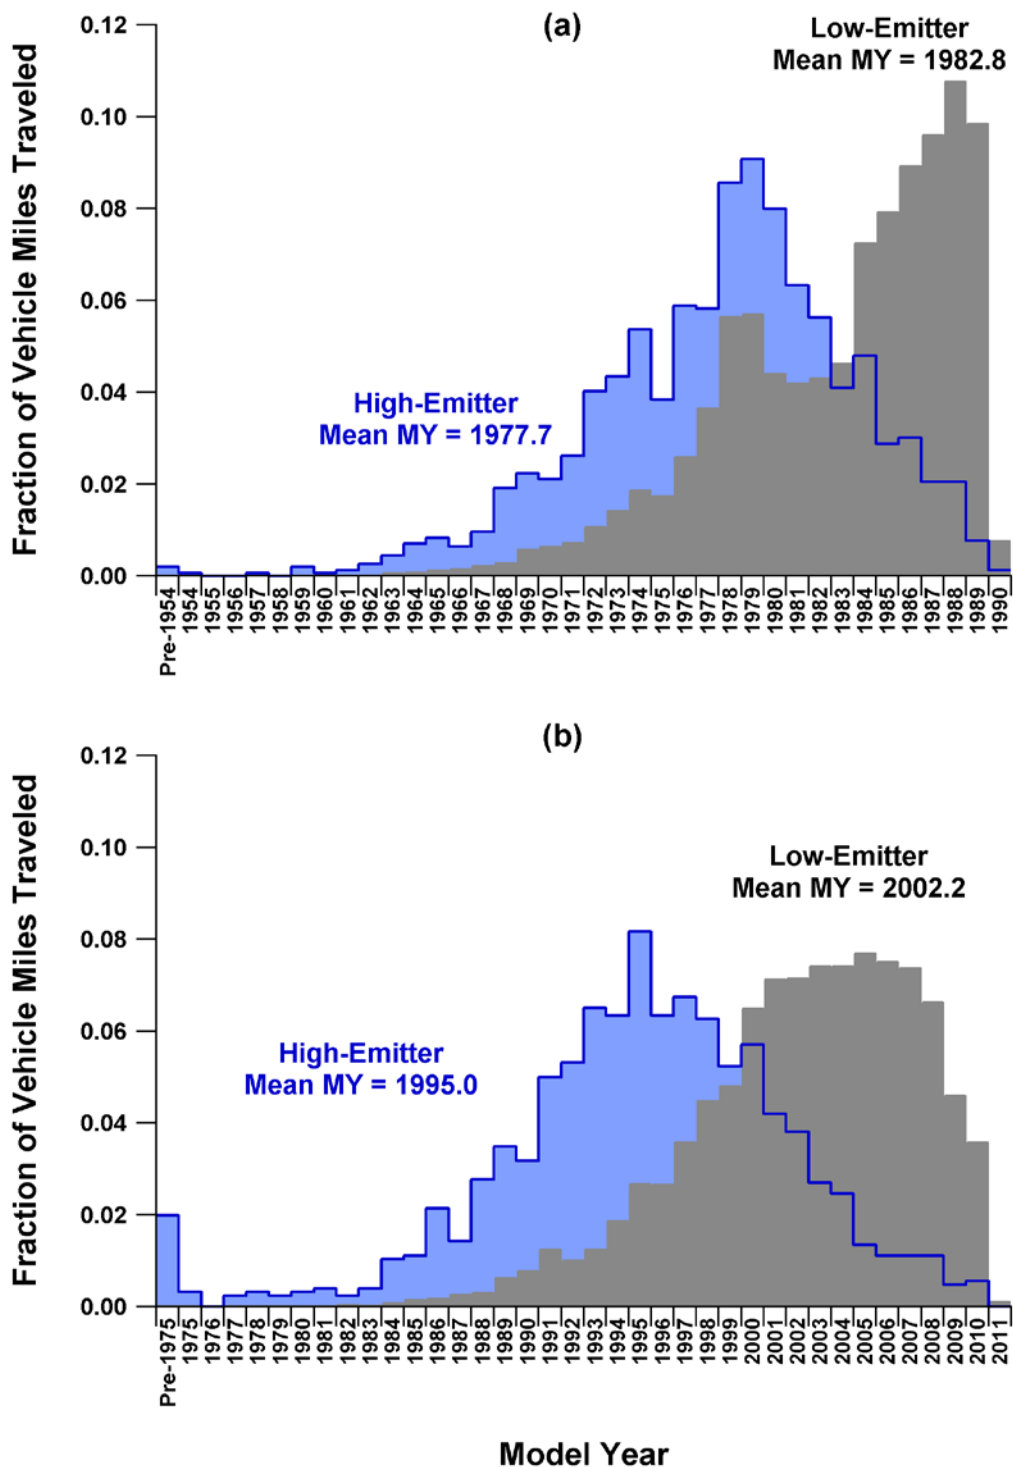

**FIGURE S8.** Vehicle age distributions of high and low emitting vehicles for running exhaust emissions of CO from remote sensing in Los Angeles for (a) 1989 and (b) 2010. High emitting vehicles are defined as the top 10% and low emitting as the bottom 90%.

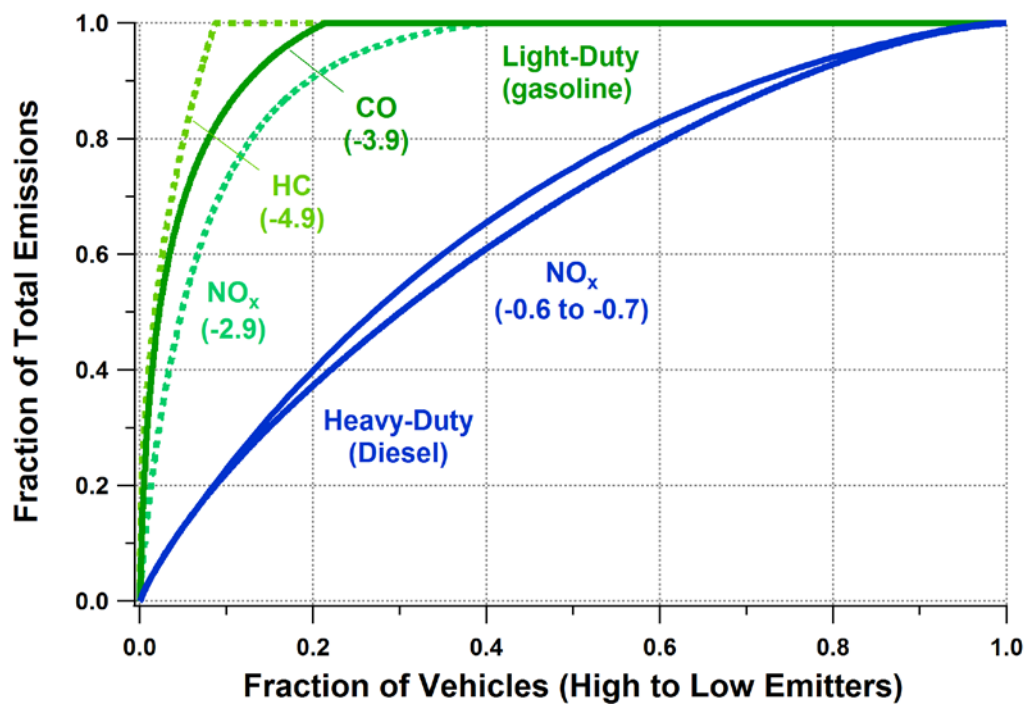

**FIGURE S9.** Distribution of running exhaust emissions for NMHC, CO, and NO<sub>x</sub> in 2010. Light-duty measurements are for the same location in Los Angeles. Similar results for heavy-duty diesel NO<sub>x</sub> are shown based on remote sensing at Peralta weigh station in Anaheim (lower blue line) and tunnel measurements in Oakland (upper blue line).

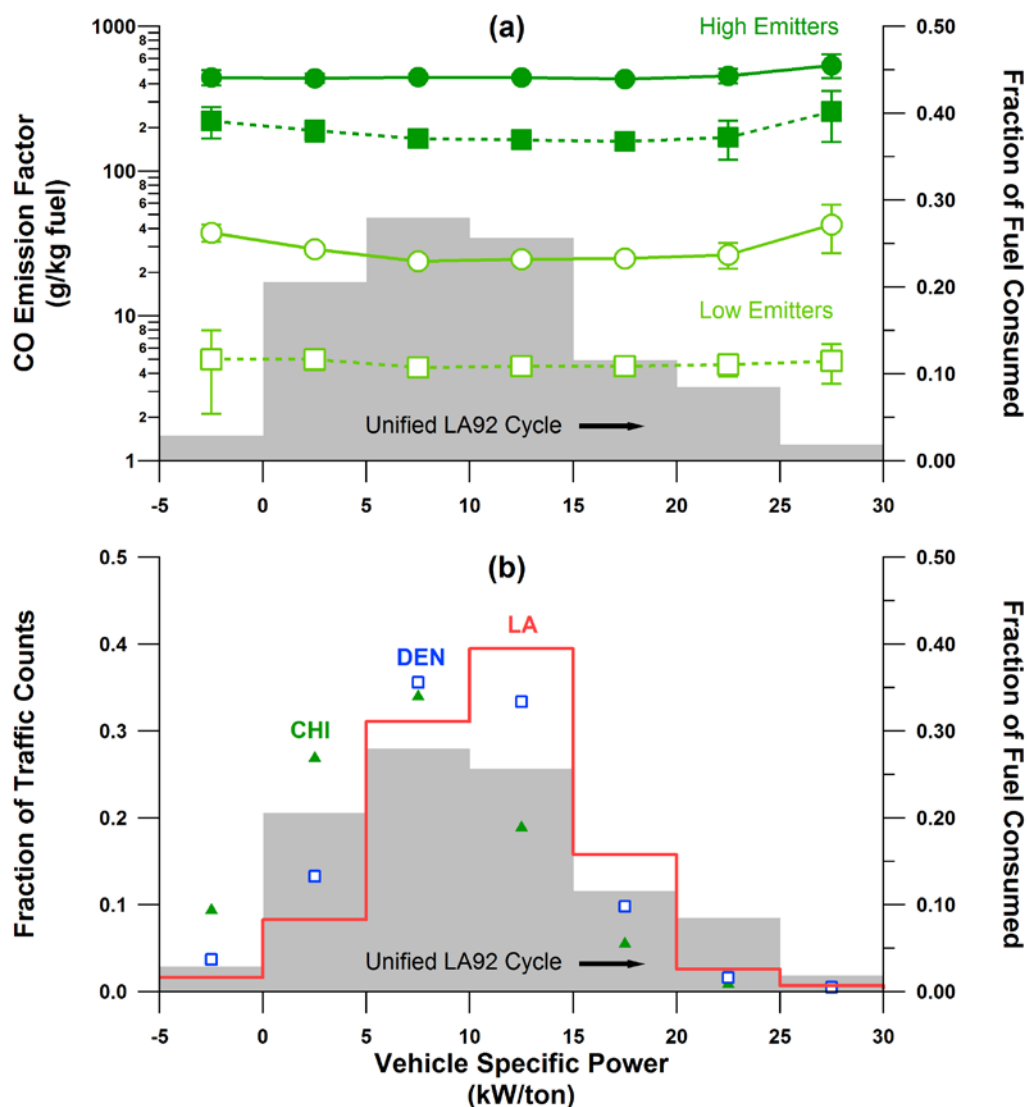

**FIGURE S10.** (a) Variability of CO emission factors with engine load at remote sensing from West Los Angeles. High-emitters are defined as the top 10% of vehicles. Vehicle specific power is calculated as  $VSP = 4.39 \cdot \sin(\text{slope}) \cdot v + 0.22 \cdot v \cdot a + 0.0954 \cdot v + 0.0000272 \cdot v^3$ , where slope is in degrees,  $v$  = velocity in mph, and  $a$  = acceleration mph/s (33). The remaining vehicles are labeled as low emitters. Emission factors for each subgroup are shown for the years 1999 (solid lines) and 2008 (dashed lines). (b) Distribution of engine loads for remote sensing in West Los Angeles, Denver, and Chicago as compared to the California Unified LA92 drive cycle.

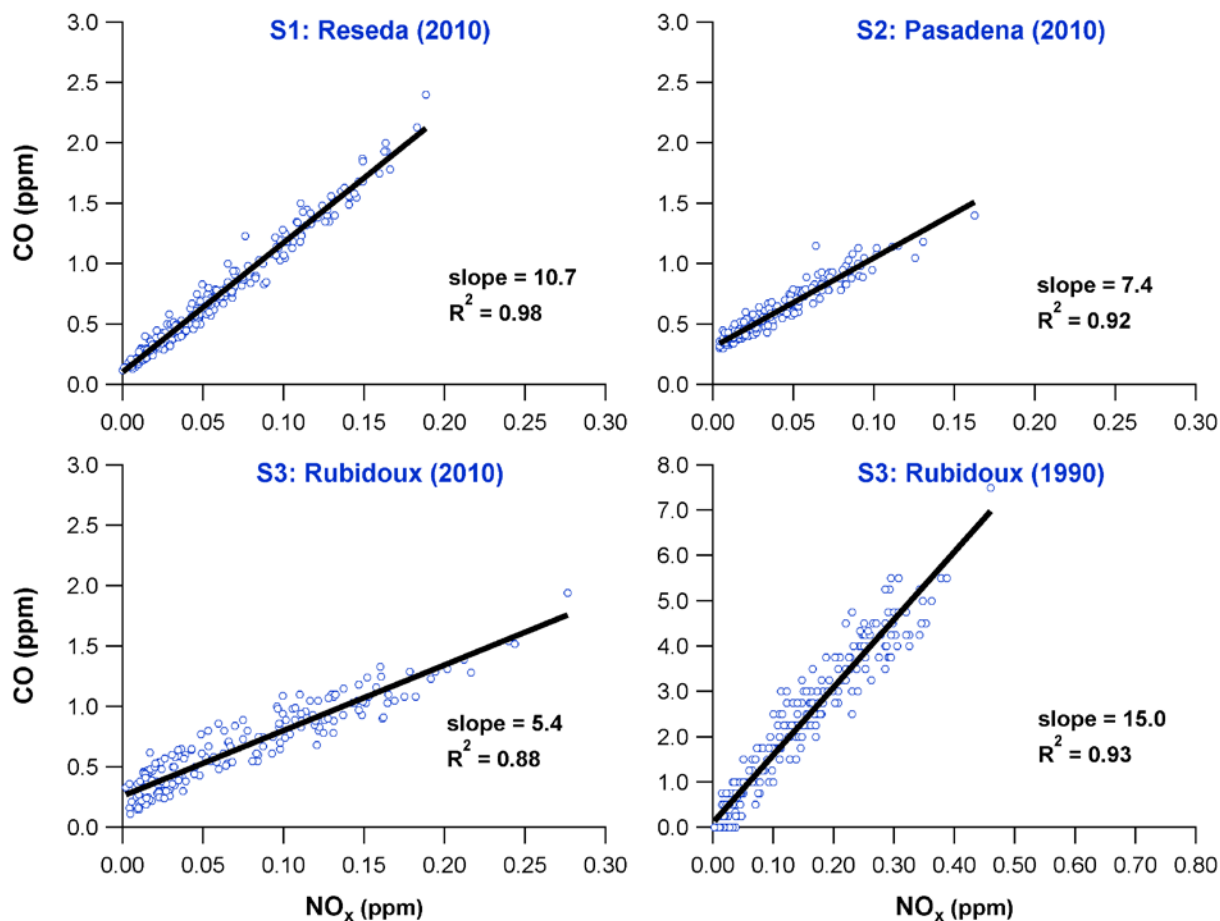

**FIGURE S11.** Examples of analysis used to determine ambient CO/NO<sub>x</sub> ratios during morning peak hours (0500 to 0800 PST). Site locations can be found in Figure S2. The three sites represent the range of ambient ratios found spatially across the South Coast air basin for the year 2010. Rubidoux is shown for the years 1990 and 2010, showing the temporal change in CO/NO<sub>x</sub> observed at a single site. Note that the scale for 1990 is larger in the absolute for CO and NO<sub>x</sub>.

## References

1. Zhang, Y.; Stedman, D. H.; Bishop, G. A.; Beaton, S. P.; Guenther, P. L., On-road evaluation of inspection/maintenance effectiveness. *Environ Sci Technol* **1996**, 30 (5), 1445-1450; DOI 10.1021/Es950191j.
2. Bishop, G. A.; Stedman, D. H., A decade of on-road emissions measurements. *Environ Sci Technol* **2008**, 42 (5), 1651-1656; DOI 10.1021/Es702413b.
3. Bishop, G. A.; Stedman, D. H., On-Road Carbon-Monoxide Emission Measurement Comparisons for the 1988-1989 Colorado Oxy-Fuels Program. *Environ Sci Technol* **1990**, 24 (6), 843-847; DOI 10.1021/Es00076a008.
4. Bishop, G. A.; Stedman, D. H.; Hutton, R. B.; Bohren, L.; Lacey, N., Drive by motor vehicle emissions: Immediate feedback in reducing air pollution. *Environ Sci Technol* **2000**, 34 (6), 1110-1116; DOI 10.1021/Es9908725.
5. Stedman, D. H.; Bishop, G. A.; Aldrete, P.; Slott, R. S., On-road evaluation of an automobile emission test program. *Environ Sci Technol* **1997**, 31 (3), 927-931; DOI 10.1021/Es960792q.
6. Stedman, D. H.; Bishop, G. A.; Slott, R. S., Repair avoidance and evaluating inspection and maintenance programs. *Environ Sci Technol* **1998**, 32 (10), 1544-1545; DOI 10.1021/Es9711019.
7. Kirchstetter, T. W.; Singer, B. C.; Harley, R. A.; Kendall, G. B.; Chan, W., Impact of oxygenated gasoline use on California light-duty vehicle emissions. *Environ Sci Technol* **1996**, 30 (2), 661-670; DOI 10.1021/Es950406p.
8. Kean, A. J.; Sawyer, R. F.; Harley, R. A.; Kendall, G. R., Trends in Exhaust Emissions from In-Use California Light-Duty Vehicles, 1994-2001. *SAE SP* **2002**, 167-174.
9. Ban-Weiss, G. A.; Mclaughlin, J. P.; Harley, R. A.; Kean, A. J.; Grosjean, E.; Grosjean, D., Carbonyl and nitrogen dioxide emissions from gasoline- and diesel-powered motor vehicles. *Environ Sci Technol* **2008**, 42 (11), 3944-3950; DOI 10.1021/Es8002487.
10. Dallmann, T. R.; Kirchstetter, T. W.; DeMartini, S. J.; Harley, R. A., Characterization of Exhaust Emission Factors and Relative On-Road Emission Inventory Contributions for Light-Duty Vehicles (submitted). **2013**.
11. Bishop, G. A.; Peddle, A. M.; Stedman, D. H.; Zhan, T., On-Road Emission Measurements of Reactive Nitrogen Compounds from Three California Cities. *Environ Sci Technol* **2010**, 44 (9), 3616-3620; DOI 10.1021/Es903722p.
12. Lawson, D. R.; Groblicki, P. J.; Stedman, D. H.; Bishop, G. A.; Guenther, P. L., Emissions from in-Use Motor Vehicles in Los-Angeles - a Pilot-Study of Remote-Sensing and the Inspection and Maintenance Program. *J Air Waste Manage* **1990**, 40 (8), 1096-1105; DOI 10.1080/10473289.1990.10466754.
13. Singer, B. C.; Harley, R. A., A fuel-based motor vehicle emission inventory. *J Air Waste Manage* **1996**, 46 (6), 581-593; DOI 10.1080/10473289.1996.10467492.
14. Singer, B. C.; Harley, R. A., A fuel-based inventory of motor vehicle exhaust emissions in the Los Angeles area during summer 1997. *Atmos Environ* **2000**, 34 (11), 1783-1795; DOI 10.1016/S1352-2310(99)00358-1.
15. Bishop, G. A.; Schuchmann, B. G.; Stedman, D. H.; Lawson, D. R., Multispecies remote sensing measurements of vehicle emissions on Sherman Way in Van Nuys, California. *J Air Waste Manage* **2012**, 62 (10), 1127-1133; DOI 10.1080/10962247.2012.699015.

16. Fraser, M. P.; Cass, G. R., Detection of excess ammonia emissions from in-use vehicles and the implications for fine particle control. *Environ Sci Technol* **1998**, 32 (8), 1053-1057; DOI 10.1021/Es970382h.
17. Gertler, A. W.; Sagebiel, J. C.; Wittorff, D. N.; Pierson, W. R.; Dippel, W. A.; Freeman, D.; Sheetz, L. *Vehicle Emissions in Five Urban Tunnels. Final report no. E-5*; Coordinating Research Council, Inc.: Atlanta, GA, 1997.
18. Fujita, E. M.; Campbell, D. E.; Zielinska, B.; Chow, J. C.; Lindhjem, C. E.; DenBleyker, A.; Bishop, G. A.; Schuchmann, B. G.; Stedman, D. H.; Lawson, D. R., Comparison of the MOVES2010a, MOBILE6.2, and EMFAC2007 mobile source emission models with on-road traffic tunnel and remote sensing measurements. *J Air Waste Manage* **2012**, 62 (10), 1134-1149; DOI 10.1080/10962247.2012.699016.
19. Pokharel, S. S.; Bishop, G. A.; Stedman, D. H.; Slott, R., Emissions reductions as a result of automobile improvement. *Environ Sci Technol* **2003**, 37 (22), 5097-5101; DOI 10.1021/Es026340x.
20. Warneke, C.; McKeen, S. A.; de Gouw, J. A.; Goldan, P. D.; Kuster, W. C.; Holloway, J. S.; Williams, E. J.; Lerner, B. M.; Parrish, D. D.; Trainer, M.; Fehsenfeld, F. C.; Kato, S.; Atlas, E. L.; Baker, A.; Blake, D. R., Determination of urban volatile organic compound emission ratios and comparison with an emissions database. *J Geophys Res-Atmos* **2007**, 112, D10S47; DOI 10.1029/2006jd007930.
21. Baker, A. K.; Beyersdorf, A. J.; Doezema, L. A.; Katzenstein, A.; Meinardi, S.; Simpson, I. J.; Blake, D. R.; Rowland, F. S., Measurements of nonmethane hydrocarbons in 28 United States cities. *Atmos Environ* **2008**, 42 (1), 170-182; DOI 10.1016/j.atmosenv.2007.09.007.
22. Gentner, D. R.; Harley, R. A.; Miller, A. M.; Goldstein, A. H., Diurnal and Seasonal Variability of Gasoline-Related Volatile Organic Compound Emissions in Riverside, California. *Environ Sci Technol* **2009**, 43 (12), 4247-4252; DOI 10.1021/Es9006228.
23. Warneke, C.; de Gouw, J. A.; Holloway, J. S.; Peischl, J.; Ryerson, T. B.; Atlas, E.; Blake, D.; Trainer, M.; Parrish, D. D., Multiyear trends in volatile organic compounds in Los Angeles, California: Five decades of decreasing emissions. *J Geophys Res-Atmos* **2012**, 117, D00V17; DOI 10.1029/2012jd017899.
24. Gentner, D. R.; Isaacman, G.; Worton, D. R.; Chan, A. W.; Dallmann, T. R.; Davis, L.; Liu, S.; Day, D. A.; Russell, L. M.; Wilson, K. R.; Weber, R.; Guha, A.; Harley, R. A.; Goldstein, A. H., Elucidating secondary organic aerosol from diesel and gasoline vehicles through detailed characterization of organic carbon emissions. *Proc Natl Acad Sci USA* **2012**, 109 (45), 18318-23; DOI 10.1073/pnas.1212272109.
25. Harley, R. A.; Hannigan, M. P.; Cass, G. R., Respeciation of Organic Gas Emissions and the Detection of Excess Unburned Gasoline in the Atmosphere. *Environ Sci Technol* **1992**, 26 (12), 2395-2408; DOI 10.1021/Es00036a010.
26. McDonald, B. C.; Dallmann, T. R.; Martin, E. W.; Harley, R. A., Long-term trends in nitrogen oxide emissions from motor vehicles at national, state, and air basin scales. *J Geophys Res-Atmos* **2012**, 117, D00V18; DOI 10.1029/2012jd018304.
27. Marr, L. C.; Harley, R. A., Modeling the effect of weekday-weekend differences in motor vehicle emissions on photochemical air pollution in central California. *Environ Sci Technol* **2002**, 36 (19), 4099-4106; DOI 10.1021/Es020629x.
28. *2010 Annual Average Daily Truck Traffic on the California State Highway System*; Traffic and Vehicle Data Systems, California Department of Transportation: Sacramento, CA, 2010; <http://traffic-counts.dot.ca.gov/>.



29. *2009 National Household Travel Survey*; Federal Highway Administration, U.S. Department of Transportation: Washington, DC, 2011; <http://nhts.ornl.gov/index.shtml>.
30. *2001 National Household Travel Survey*; Federal Highway Administration, U.S. Department of Transportation: Washington, DC, 2004; <http://nhts.ornl.gov/index.shtml>.
31. *1990 National Household Travel Survey*; Federal Highway Administration, U.S. Department of Transportation: Washington, DC, 1991; <http://nhts.ornl.gov/index.shtml>.
32. *State and Federal Standards for Mobile-Source Emissions*; National Research Council of the National Academies: Washington, DC, 2006.
33. Jimenez, J. L.; McClintock, P.; McRae, G. J.; Nelson, D. D.; Zahniser, M. S. Vehicle specific power: A useful parameter for remote sensing and emission studies. *Proceedings of the Ninth CRC On-Road Vehicle Emissions Workshop*, Coordinating Research Council, Inc., Atlanta, GA, 1999.
